# Supplementary material
Source: PubMed Central journal article supplement (PMC4201132)
Supplement: supp_114.060285_Supplementary_Information_60285.pdf [file supp_114.060285_Supplementary_Information_60285.pdf]

*Drug Metabolism and Disposition*

**Supplementary Information**

**Gene variants in *CYP2C19* are associated with altered *in vivo* bupropion pharmacokinetics but not bupropion assisted smoking cessation outcomes**

Andy Z.X. Zhu; Qian Zhou; Lisa Sanderson Cox, Jasjit S. Ahluwalia; Neal L. Benowitz and Rachel F. Tyndale

**Supplementary Table S1.** Baseline demographics of Study 1.

|                               | White (n=21) | African American (n=14) | Asians (n=7) |
|-------------------------------|--------------|-------------------------|--------------|
| Sex (% male)                  | 62           | 50                      | 86           |
| Age in years<br>(mean, range) | 29 (19, 51)  | 33 (22, 64)             | 37(22, 60)   |
| BMI<br>(mean, range)          | 24 (19, 33)  | 26 (20, 34)             | 29 (21, 54)  |
| <i>CYP2C19</i> genotype       |              |                         |              |
| *1/*1                         | n=7          | n=7                     | n=3          |
| *1/*2                         | n=5          | n=2                     | n=3          |
| *1/*17                        | n=5          | n=4                     |              |
| *17/*17                       | n=1          |                         |              |
| *2/*17                        | n=3          | n=1                     | n=1          |

We also genotyped for *CYP2C19*\*3 in this study, but did not find any participants with the *CYP2C19*\*3 allele.

**Supplementary Table S2.** Plasma pharmacokinetic parameters and urinary bupropion and metabolite recovery for bupropion and metabolites by *CYP2C19* genotype

| Plasma                                  | All (n=42)          | No variant (n=17)    | with *2 (n=15)          | with *17 (n=15)     |
|-----------------------------------------|---------------------|----------------------|-------------------------|---------------------|
|                                         | Mean (95%CI)        | Mean (95%CI)         | Mean (95%CI)            | Mean (95%CI)        |
| BUP                                     |                     |                      |                         |                     |
| AUC <sub>24</sub> (h ng/ml)             | 685 (631,739)       | 670 (585,754)        | <b>771 (694,848)</b>    | 663 (550,775)       |
| C <sub>max</sub> (ng/ml)                | 58 (52,63)          | 58 (49,67)           | 66 (56,77)              | 54 (41,67)          |
| C <sub>ss</sub> (ng/ml)                 | 29 (26,31)          | 28 (24,31)           | 32 (29,35)              | 28 (23,32)          |
| OH-BUP                                  |                     |                      |                         |                     |
| AUC <sub>24</sub> (h ng/ml)             | 9524 (8319,10729)   | 9401 (7686,11115)    | 9929 (7971,11887)       | 9558 (6982,12135)   |
| C <sub>max</sub> (ng/ml)                | 464 (405,524)       | 463 (380,546)        | 476 (377,576)           | 470 (338,601)       |
| C <sub>ss</sub> (ng/ml)                 | 397 (347,447)       | 392 (320,463)        | 414 (332,495)           | 398 (291,506)       |
| AUC OH-BUP/BUP                          | 14.4 (12.6,16.2)    | 14.7 (12,17.5)       | 13.2 (10.2,16.2)        | 14.7 (11.1,18.3)    |
| EB                                      |                     |                      |                         |                     |
| AUC <sub>24</sub> (h ng/ml)             | 772 (689,856)       | 732 (618,846)        | <b>947 (802,1093)</b>   | 714 (573,854)       |
| C <sub>max</sub> (ng/ml)                | 38 (35,42)          | 37 (31,42)           | <b>47 (40,53)</b>       | 35 (28,42)          |
| C <sub>ss</sub> (ng/ml)                 | 32 (29,36)          | 31 (26,35)           | 40 (33,46)              | 30 (24,36)          |
| AUC EB /BUP                             | 1.2 (1,1.3)         | 1.1 (1,1.3)          | 1.2 (1.1,1.4)           | 1.1 (0.9,1.3)       |
| TB                                      |                     |                      |                         |                     |
| AUC <sub>24</sub> (h ng/ml)             | 4209 (3612,4807)    | 3867 (3134,4601)     | <b>5427 (4168,6686)</b> | 3669 (2927,4411)    |
| C <sub>max</sub> (ng/ml)                | 208 (180,236)       | 193 (155,231)        | <b>267 (211,323)</b>    | 183 (147,219)       |
| C <sub>ss</sub> (ng/ml)                 | 175 (150,200)       | 161 (131,192)        | 226 (174,279)           | 153 (122,183)       |
| AUC TB/BUP                              | 6.2 (5.5,6.9)       | 5.9 (4.9,6.9)        | 7.1 (5.6,8.6)           | 5.7 (4.8,6.6)       |
| <b>Urinary 24 hours recovery (nmol)</b> | <b>Mean (95%CI)</b> | <b>Mean (95%CI)</b>  | <b>Mean (95%CI)</b>     | <b>Mean (95%CI)</b> |
| Total                                   | 67824 (51128,84520) | 74825 (48476,101173) | 71393 (33478,109309)    | 52890 (38439,67341) |
| BUP                                     | 2087 (1512,2662)    | 2465 (1196,3735)     | 1762 (1072,2452)        | 1896 (1204,2587)    |
| BUP/Total Recovery (%)                  | 0.07 (0.04,0.10)    | 0.09 (0.04,0.14)     | 0.03 (0.00,0.06)        | 0.06 (0.00,0.12)    |
| OH-BUP-free                             | 3672 (2782,4561)    | 4420 (2555,6284)     | 2941 (1889,3993)        | 3234 (2042,4426)    |
| OH-BUP-glucuronide                      | 12283 (10393,14173) | 12249 (10042,14457)  | 13574 (9081,18067)      | 11041 (8406,13676)  |
| OH-BUP/Total Recovery (%)               | 28.8 (25,32.6)      | 27.5 (21.5,33.5)     | 27.8 (22.8,32.8)        | 31.3 (23.3,39.4)    |
| EB-free                                 | 4872 (3753,5991)    | 5574 (3751,7396)     | 4564 (2258,6870)        | 4111 (2704,5519)    |
| EB- glucuronide                         | 1718 (1438,1998)    | 1759 (1432,2086)     | 1982 (1284,2679)        | 1592 (1141,2042)    |
| EB/Total Recovery (%)                   | 10.3 (9.8,10.9)     | 10.5 (9.5,11.4)      | 10.1 (8.9,11.3)         | 10.9 (9.9,11.9)     |
| TB-free                                 | 38376 (27180,49572) | 43345 (25732,60957)  | 39718 (14184,65251)     | 28779 (18908,38649) |
| TB- glucuronide                         | 4778 (2539,7017)    | 4946 (1476,8417)     | 6839 (1722,11957)       | 2217 (805,3629)     |
| TB/Total Recovery (%)                   | 57.8 (54.1,61.4)    | 58.9 (52.9,65)       | 59.4 (54.2,64.7)        | 54.3 (47.1,61.5)    |
| <b>% daily dose recovered</b>           | <b>Mean (95%CI)</b> | <b>Mean (95%CI)</b>  | <b>Mean (95%CI)</b>     | <b>Mean (95%CI)</b> |
| BUP                                     | 0.3 (0.2,0.4)       | 0.4 (0.2,0.6)        | 0.3 (0.2,0.4)           | 0.3 (0.2,0.4)       |
| OH-BUP-free                             | 0.6 (0.4,0.7)       | 0.7 (0.4,1.0)        | 0.5 (0.3,0.6)           | 0.5 (0.3,0.7)       |
| OH-BUP-glucuronide                      | 2.0 (1.7,2.3)       | 2.0 (1.6,2.3)        | 2.2 (1.5,2.9)           | 1.8 (1.3,2.2)       |
| EB-free                                 | 0.8 (0.6,1.0)       | 0.9 (0.6,1.2)        | 0.7 (0.4,1.1)           | 0.7 (0.4,0.9)       |
| EB- glucuronide                         | 0.3 (0.2,0.3)       | 0.3 (0.2,0.3)        | 0.3 (0.2,0.4)           | 0.3 (0.2,0.3)       |
| TB-free                                 | 6.1 (4.3,7.9)       | 6.9 (4.1,9.8)        | 6.4 (2.3,10.4)          | 4.6 (3.6,2.0)       |
| TB- glucuronide                         | 0.8 (0.4,1.1)       | 0.8 (0.2,1.3)        | 1.1 (0.3,1.9)           | 0.4 (0.1,0.6)       |

There were five individuals with \*2/\*17 genotype.

Bolded values indicate statistical significance compared with no variants using linear regression analyses as presented in Table 1.

**Supplementary Table S3.** Baseline demographics of Study 2.

|                              | Placebo          | Bupropion        |
|------------------------------|------------------|------------------|
| % African American           | 100%             | 100%             |
| Sex (% male)                 | 68%              | 64%              |
| Age (years)<br>(mean, range) | 46.2<br>(19, 80) | 46.8<br>(22, 73) |
| BMI<br>(mean, range)         | 31<br>(15, 68)   | 31<br>(16, 63)   |
| <i>CYP2C19</i> genotype      |                  |                  |
| *1/*1                        | n=104            | n=93             |
| *1/*2                        | n=60             | n=60             |
| *2/*2                        | n=6              | n=8              |
| *1/*17                       | n=60             | n=77             |
| *17/*17                      | n=10             | n=10             |
| *2/*17                       | n=27             | n=20             |
